# Supplementary material for: Environmental (in)dependence of a hybrid zone: Insights from molecular markers and ecological niche modeling in a hybrid zone of Origanum (Lamiaceae) on the island of Crete
Source: PubMed Central journal article supplement (PMC5192822; doi:10.1002/ece3.2560), 2016-11-16
Supplement: ECE3-6-8727-s002.pdf [file ECE3-6-8727-s002.pdf]

Type A

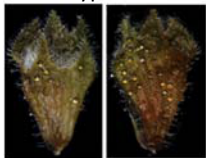

Type B

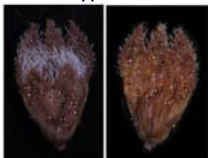

Type C

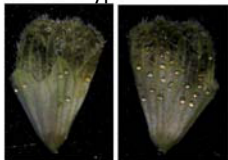

Type D

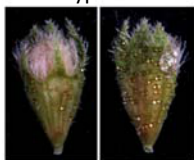

Type E

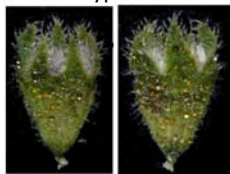

Type F

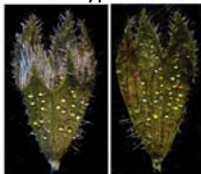

Type G

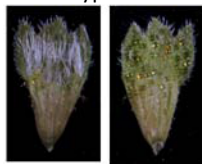

Type H

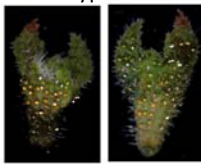

**Fig. S3** Photographs of *Origanum × intercedens* calyx types A-H. For each pair, the image on the left corresponds to the lower lip, while the image on the right corresponds to the upper lip.
