# Supplementary material for: Environmental (in)dependence of a hybrid zone: Insights from molecular markers and ecological niche modeling in a hybrid zone of Origanum (Lamiaceae) on the island of Crete
Source: PubMed Central journal article supplement (PMC5192822; doi:10.1002/ece3.2560), 2016-11-16
Supplement: ECE3-6-8727-s003.pdf [file ECE3-6-8727-s003.pdf]

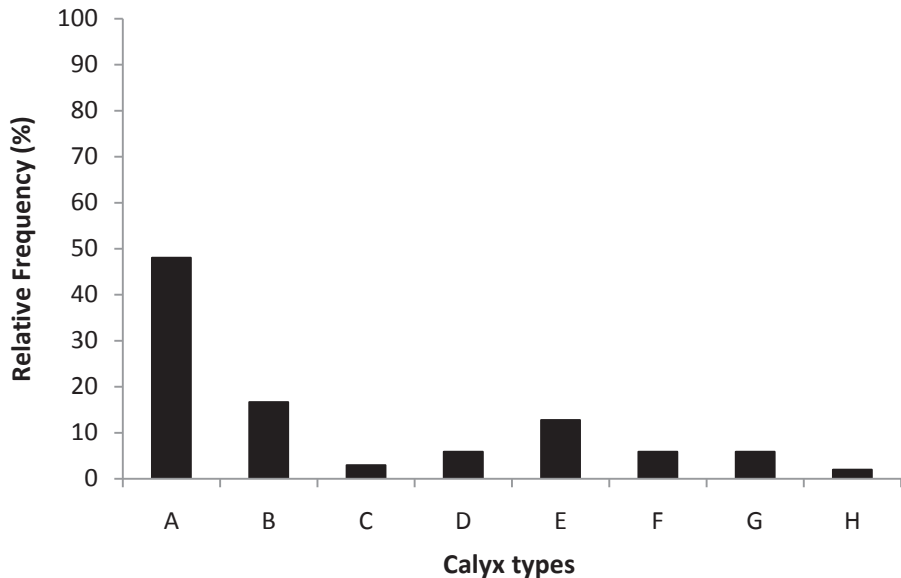

**Fig. S4** Relative frequency of the *O. x intercedens* calyx types for the sampled individuals.

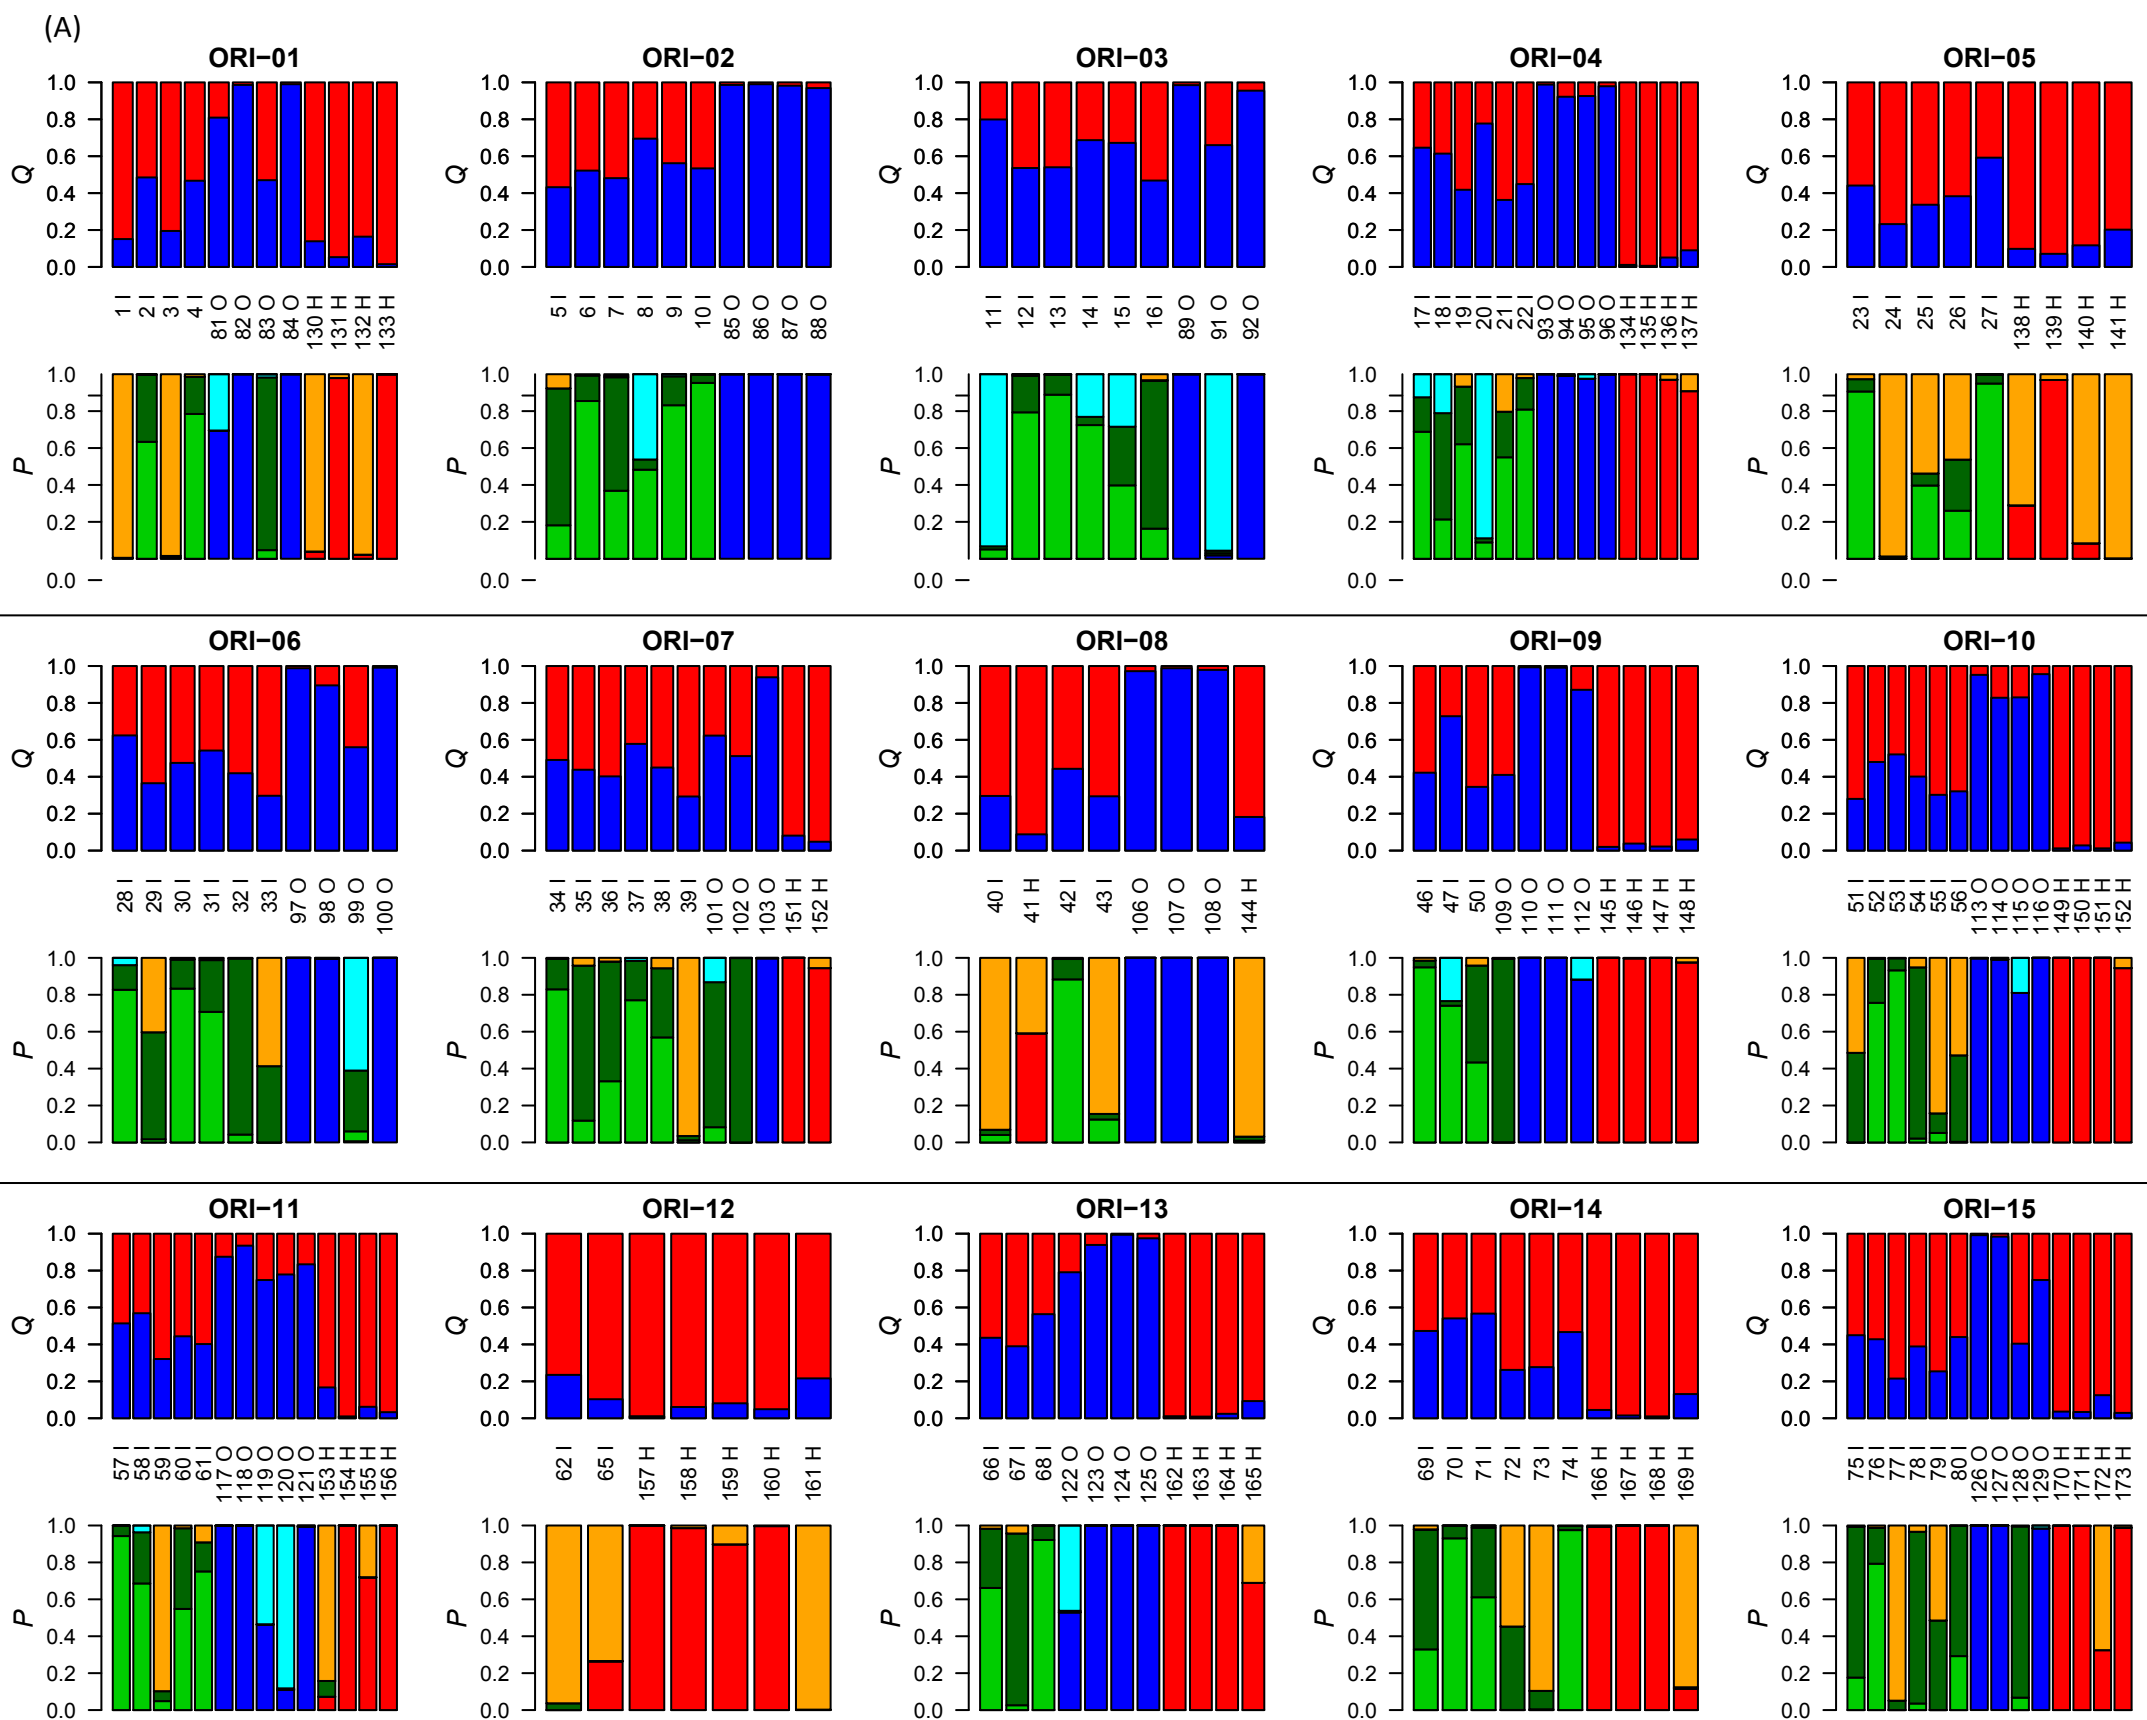

**Fig. S5** Bar plots of  $Q$ , the estimated membership coefficients for each individual in each cluster from STRUCTURE, and  $P$ , the posterior probability estimated from NEWHYBRIDS. The colors correspond to membership values for each genetic category, as shown in the legend. Panel A shows sympatric populations, while panel B shows allopatric populations. Below the bars are the individuals' numbers, along with a letter that indicates the taxa (O for *O. onites*, I for *O. × intercedens* and H for *O. vulgare* ssp. *hirtum*).

(B)

Allopatric (*O. onites*)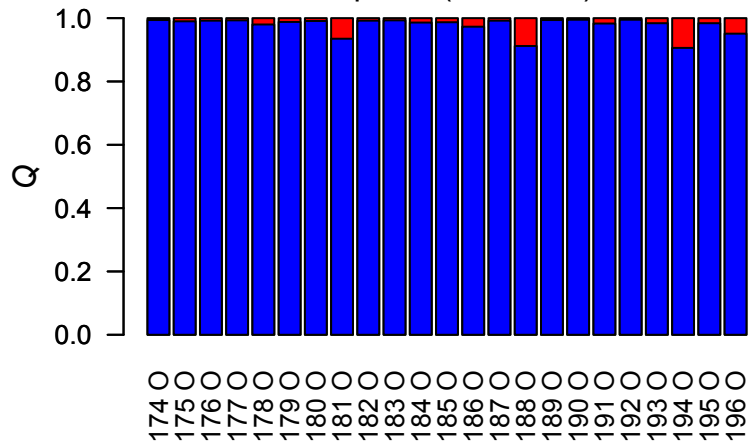

174 O  
175 O  
176 O  
177 O  
178 O  
179 O  
180 O  
181 O  
182 O  
183 O  
184 O  
185 O  
186 O  
187 O  
188 O  
189 O  
190 O  
191 O  
192 O  
193 O  
194 O  
195 O  
196 O

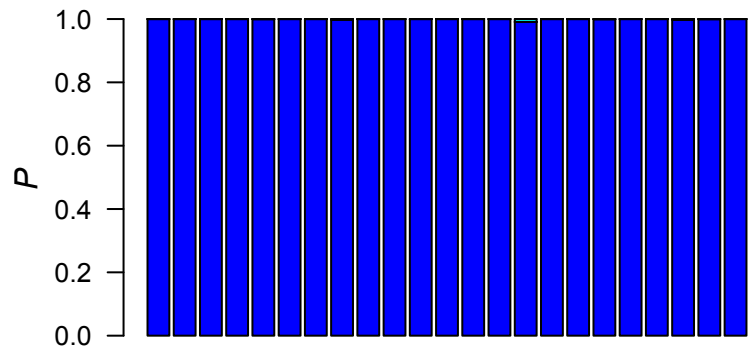Allopatric (*O. vulgare ssp. hirtum*)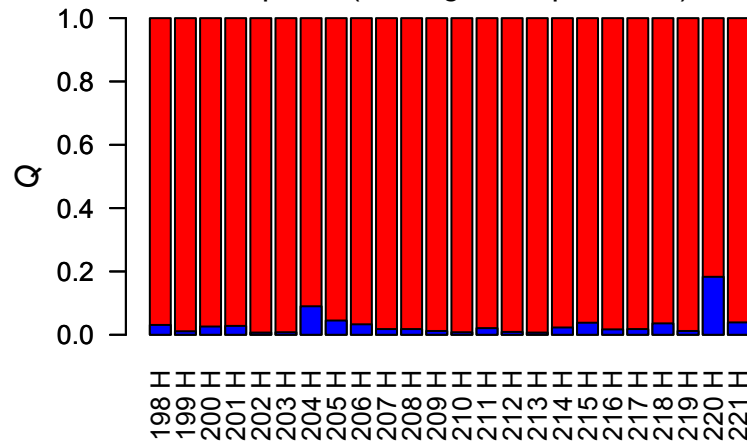

198 H  
199 H  
200 H  
201 H  
202 H  
203 H  
204 H  
205 H  
206 H  
207 H  
208 H  
209 H  
210 H  
211 H  
212 H  
213 H  
214 H  
215 H  
216 H  
217 H  
218 H  
219 H  
220 H  
221 H

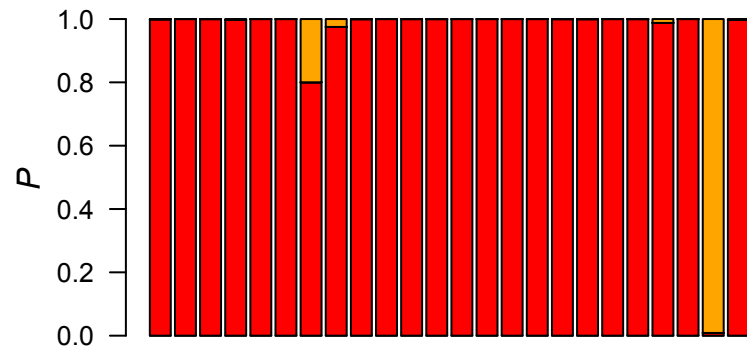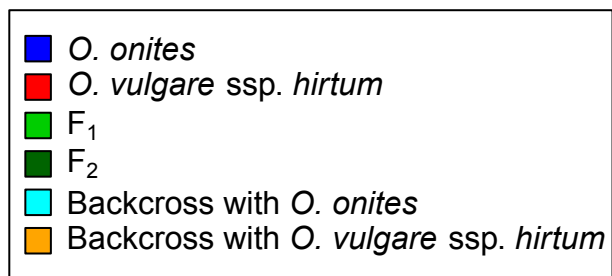

Fig. S5 (Continued)

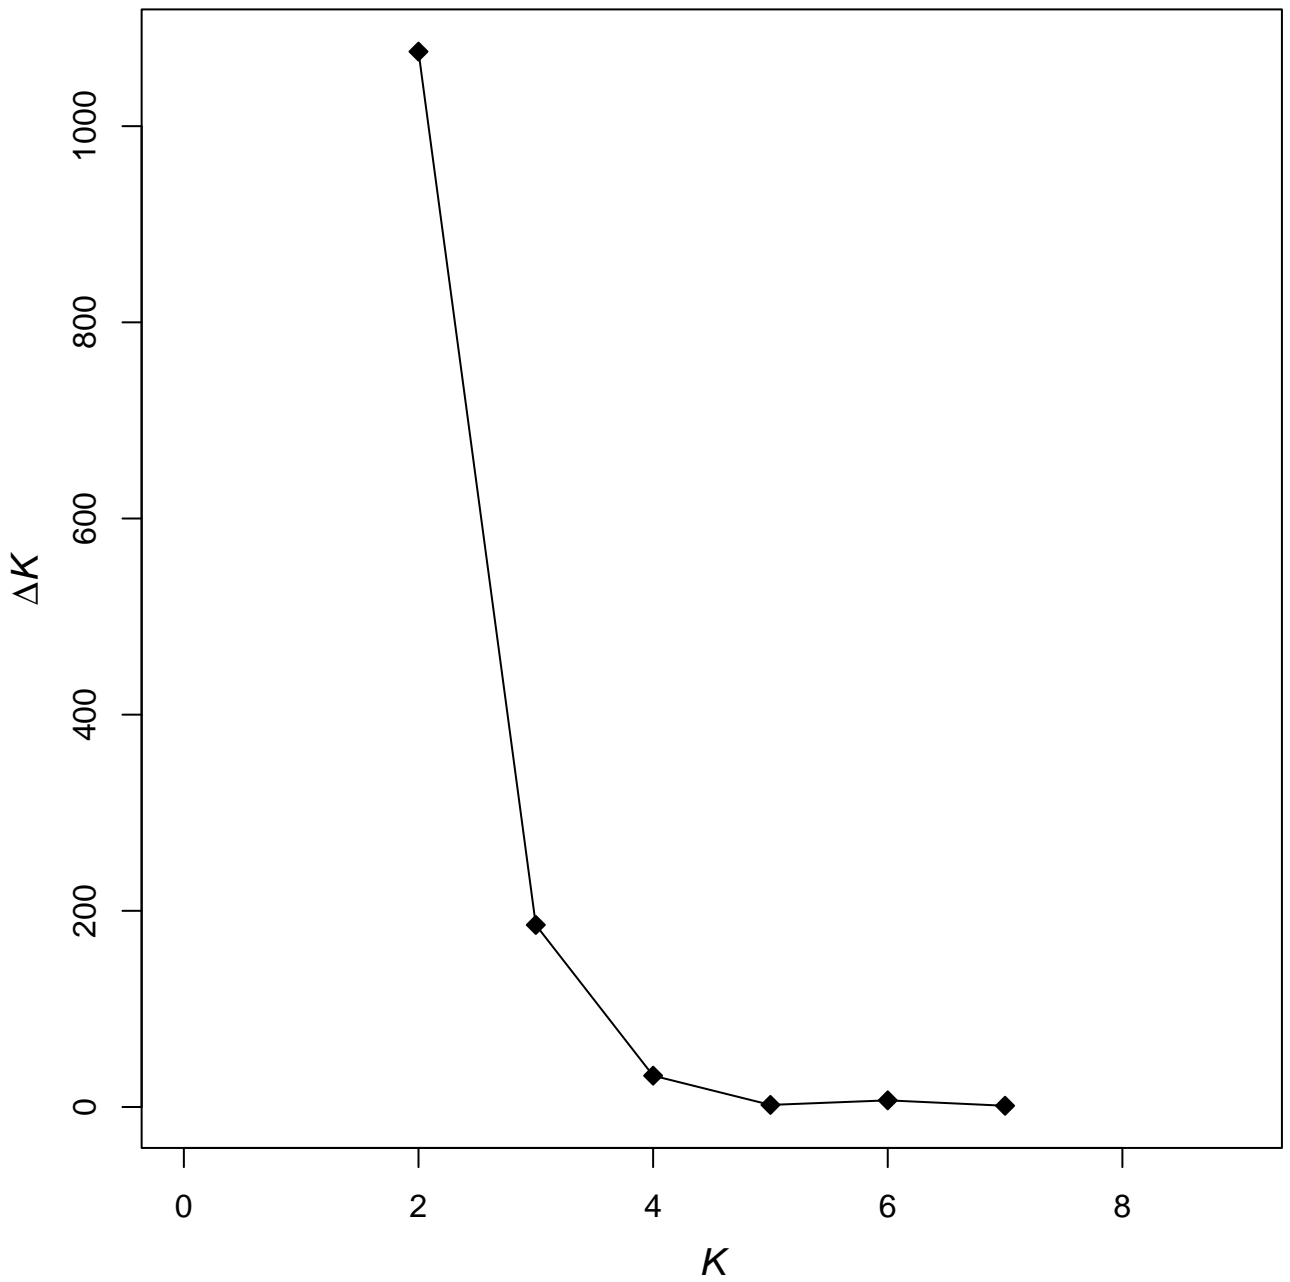

**Fig. S6**  $\Delta K$  calculated according to Evanno et al. (2005) for each  $K=1-8$ .

G-space

E-space

D

I

D

I

*O. vulgare* ssp. *hirtum*  
—  
*O. × intercedens*

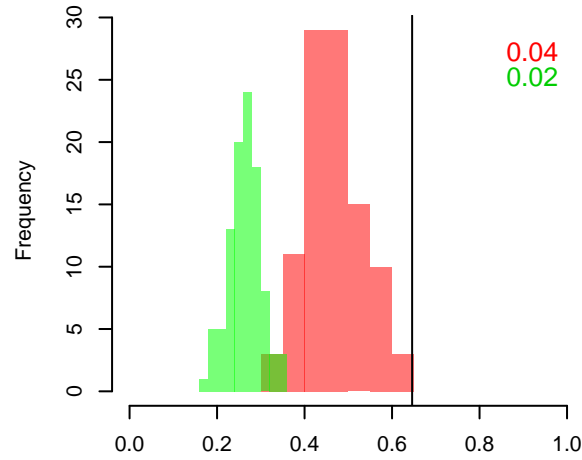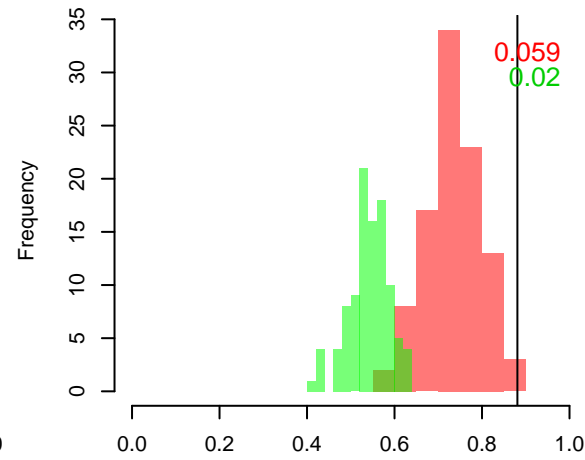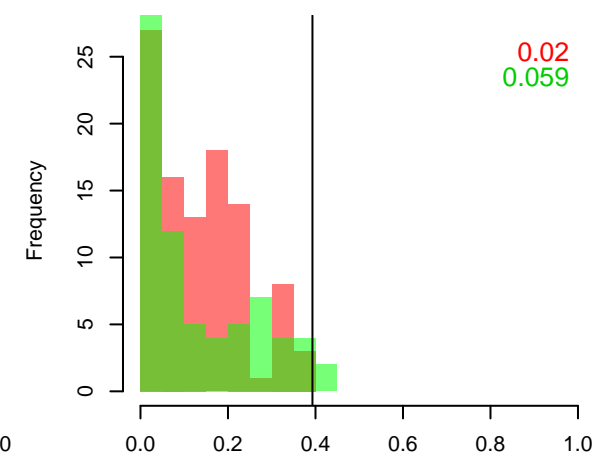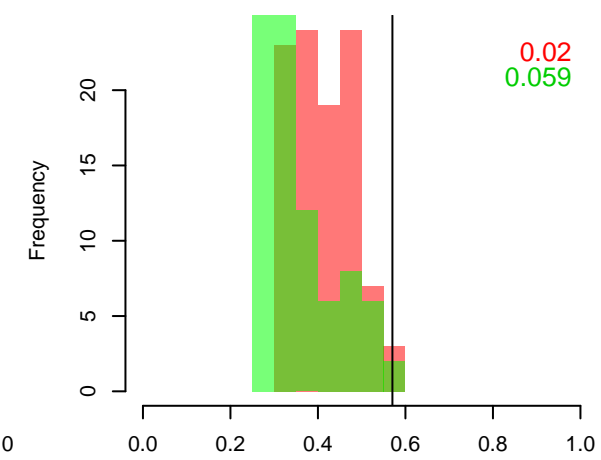

*O. vulgare* ssp. *hirtum*  
—  
*O. onites*

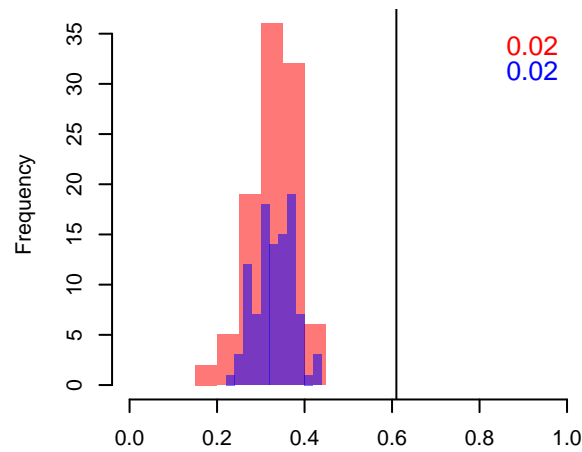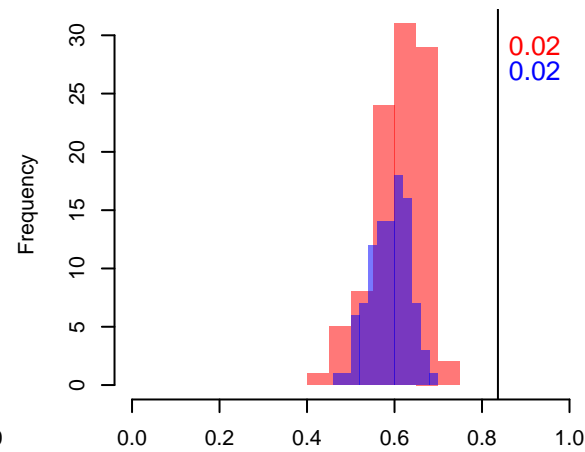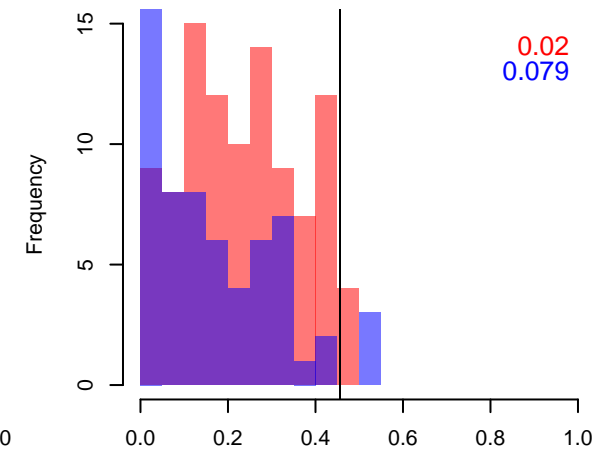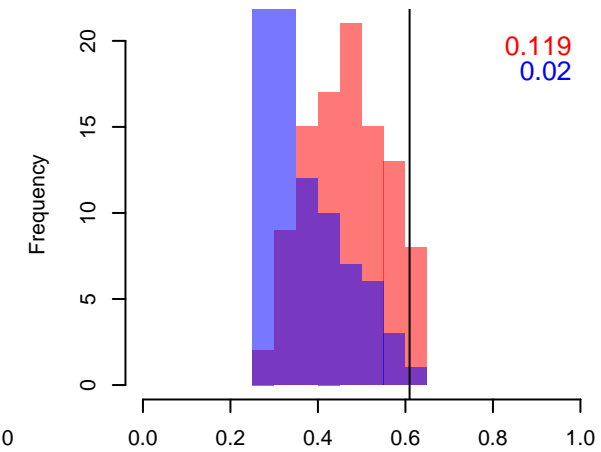

*O. × intercedens*  
—  
*O. onites*

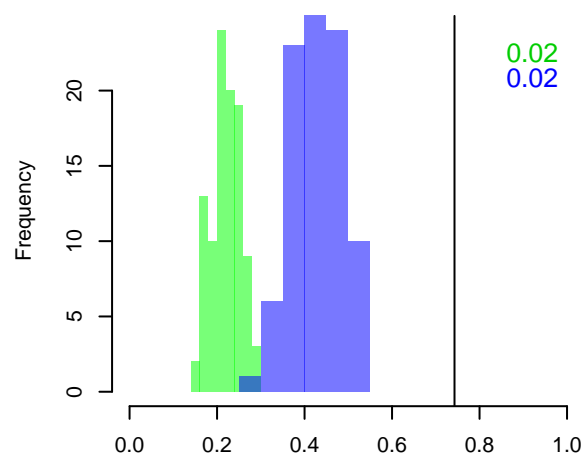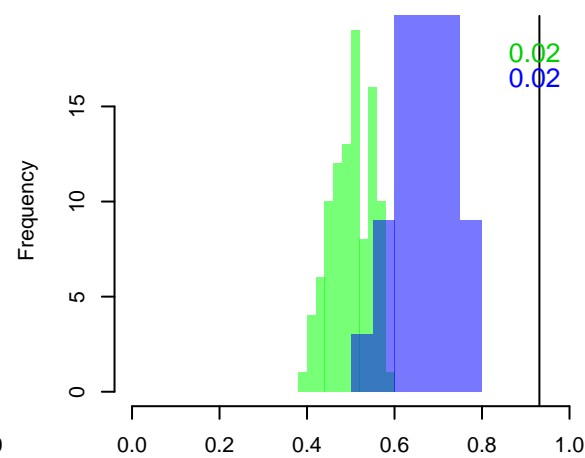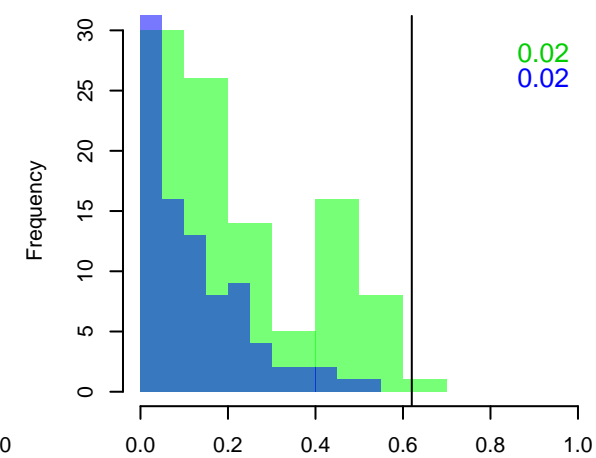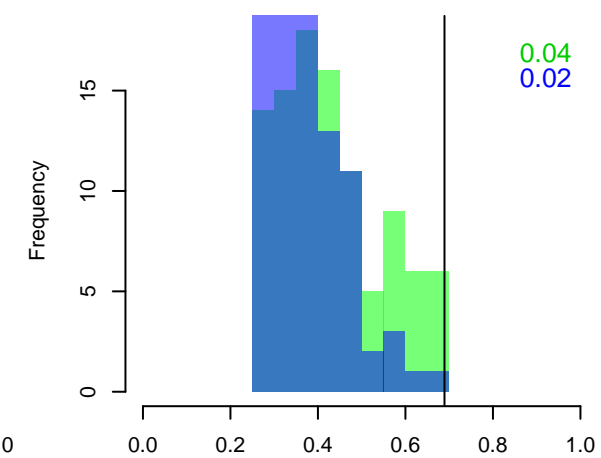

**Fig. S7** Histograms of the simulated and observed D and I metrics for the G- and E-space similarity tests of M dataset. The different colors represent the focal taxon of each test, which was tested against the background of the second taxon: red, green and blue correspond to *O. vulgare* ssp. *hirtum*, *O. × intercedens* and *O. onites*, respectively. Vertical lines indicate the observed value of the measured metric. Numbers in the top right corner of each plot are the p-values of the respective tests.
